# Supplementary material for: Multiomic Analysis Reveals Disruption of Cholesterol Homeostasis by Cannabidiol in Human Cell Lines
Source: PubMed Central journal article supplement (PMC9525918; doi:10.1016/j.mcpro.2022.100262), 2022-06-24
Supplement: mmc1.pdf [file mmc1.pdf]

**Table S1.** Biosensors used for profiling the EC50 Effects of CBD, related to Figure 1 and Supplemental Figure 1

| Targeted Analyte                     | Biosensor Gene Name | Original Literature Source                                                                                                                                                                                                                                                                                                                |
|--------------------------------------|---------------------|-------------------------------------------------------------------------------------------------------------------------------------------------------------------------------------------------------------------------------------------------------------------------------------------------------------------------------------------|
| Adam17 Protease Activity             | TSEN                | Chapnick DA, Bunker E, Liu X (2015) A biosensor for the activity of the "shedase" TACE (ADAM17) reveals novel and cell type-specific mechanisms of TACE activation. <i>Science signaling</i> 8 (365)                                                                                                                                      |
| AMP Kinase Activity                  | AMPKAR              | Tsou P, Zheng B, Hsu CH, Sasaki AT, Cantley LC (2011) A fluorescent reporter of AMPK activity and cellular energy stress. <i>Cell metabolism</i> 13 (4):476-486                                                                                                                                                                           |
| ATP Abundance                        | ATEAM               | Imamura H, Nhat KP, Togawa H, Saito K, Iino R, Kato-Yamada Y, Nagai T, Noji H (2009) Visualization of ATP levels inside single living cells with fluorescence resonance energy transfer-based genetically encoded indicators. <i>Proceedings of the National Academy of Sciences of the United States of America</i> 106 (37):15651-15656 |
| Cytosolic Ca <sup>2+</sup> Abundance | D3-cpv              | Ravier MA, Cheng-Xue R, Palmer AE, Henquin JC, Gilon P (2010) Subplasmalemmal Ca(2+) measurements in mouse pancreatic beta cells support the existence of an amplifying effect of glucose on insulin secretion. <i>Diabetologia</i> 53 (9):1947-1957                                                                                      |
| Cytosolic ERK Activity               | EKAR-NES            | Komatsu N, Aoki K, Yamada M, Yukinaga H, Fujita Y, Kamioka Y, Matsuda M (2011) Development of an optimized backbone of FRET biosensors for kinases and GTPases. <i>Molecular biology of the cell</i> 22 (23):4647-4656                                                                                                                    |
| ER Ca <sup>2+</sup> Abundance        | D1ER                | Palmer AE, Jin C, Reed JC, Tsien RY (2004) Bcl-2-mediated alterations in endoplasmic reticulum Ca <sup>2+</sup> analyzed with an improved genetically encoded fluorescent sensor. <i>Proceedings of the National Academy of Sciences of the United States of America</i> 101 (50):17404-17409                                             |
| Glucose Abundance                    | FLIPglu-30uDelta13V | Takanaga H, Frommer WB (2010) Facilitative plasma membrane transporters function during ER transit. <i>FASEB journal : official publication of the Federation of American Societies for Experimental Biology</i> 24 (8):2849-2858                                                                                                         |

|                                                  |               |                                                                                                                                                                                                                                                            |
|--------------------------------------------------|---------------|------------------------------------------------------------------------------------------------------------------------------------------------------------------------------------------------------------------------------------------------------------|
| Glutamine Abundance                              | FLIPQTV3.0 8m | Gruenwald K, Holland JT, Stromberg V, Ahmad A, Watcharakichkorn D, Okumoto S (2012) Visualization of glutamine transporter activities in living cells using genetically encoded glutamine sensors. PloS one 7 (6)                                          |
| Lactate Abundance                                | Laconic       | San Martin A, Ceballo S, Ruminot I, Lerchundi R, Frommer WB, Barros LF (2013) A genetically encoded FRET lactate sensor and its use to detect the Warburg effect in single cancer cells. PloS one 8 (2)                                                    |
| mTOR Kinase Activity                             | TORCAR        | Zhou X, Clister TL, Lowry PR, Seldin MM, Wong GW, Zhang J (2015) Dynamic Visualization of mTORC1 Activity in Living Cells. Cell reports                                                                                                                    |
| PKD Kinase Activity                              | DKAR          | Kunkel MT, Toker A, Tsien RY, Newton AC (2007) Calcium-dependent regulation of protein kinase D revealed by a genetically encoded kinase activity reporter. The Journal of biological chemistry 282 (9):6733-6742                                          |
| Plasma Membrane Electrostatic Potential (Charge) | MCS+          | Ma Y, Yamamoto Y, Nicovich PR, Goyette J, Rossy J, Gooding JJ, Gaus K (2017) A FRET sensor enables quantitative measurements of membrane charges in live cells. Nature biotechnology 35 (4):363-370                                                        |
| Plasma Membrane Potential                        | VSFP-CR       | Lam AJ, St-Pierre F, Gong Y, Marshall JD, Cranfill PJ, Baird MA, McKeown MR, Wiedenmann J, Davidson MW, Schnitzer MJ, Tsien RY, Lin MZ (2012) Improving FRET dynamic range with bright green and red fluorescent proteins. Nature methods 9 (10):1005-1012 |
| Pyruvate Abundance                               | Pyronic       | San Martin A, Ceballo S, Baeza-Lehnert F, Lerchundi R, Valdebenito R, Contreras-Baeza Y, Alegria K, Barros LF (2014) Imaging mitochondrial flux in single cells with a FRET sensor for pyruvate. PloS one 9 (1)                                            |
